# Supplementary material for: Glucocorticoid-Induced Leucine Zipper Alleviates Lung Inflammation and Enhances Bacterial Clearance during Pneumococcal Pneumonia
Source: MDPI journal article supplement (doi:10.3390/cells11030532), 2022-02-03
Supplement: s1 [file s1]

# Supplementary material

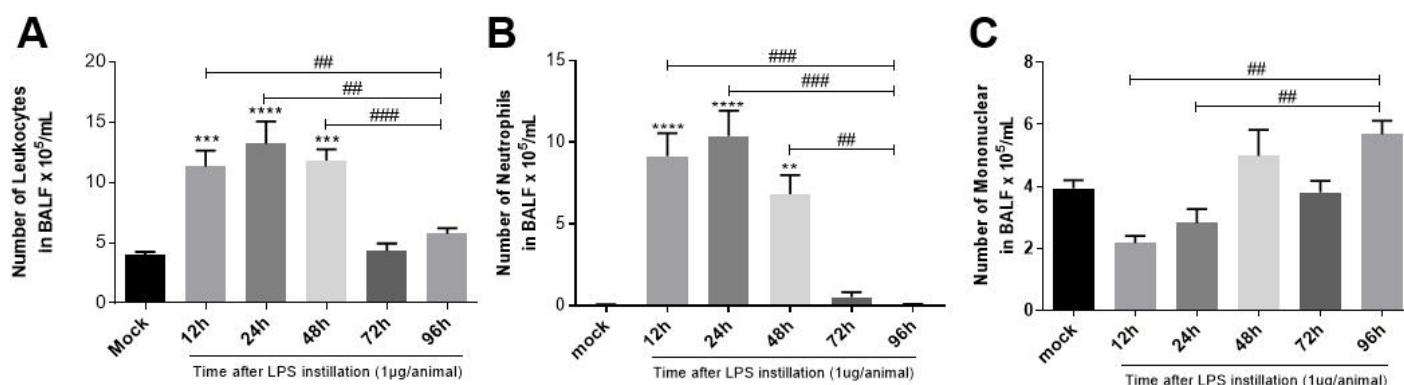

**Supplementary Figure S1. Intranasal challenge with LPS leads to an intense neutrophilic infiltrate into the alveoli.** C57BL/6 WT mice were stimulated with LPS (1 µg, i.n.) and euthanized 12, 24, 48, 72 and 96 h later. BAL was harvested to quantify the numbers leukocytes (A), neutrophils (B) and macrophages (C). Data are mean ± SEM of N = 4-5 animals per group. \* $P < 0.05$  \*\*\* $P < 0.001$  or \*\*\*\* $P < 0.0001$  when compared to the mock group (saline instilled); or as indicated by # $P < 0.05$ , ## $P < 0.01$ , ### $P < 0.001$  or #### $P < 0.0001$  when comparing LPS-challenged mice.
